# Supplementary material
Source: Elsevier journal article supplement (https://www.sciencedirect.com/science/article/pii/S0213911119302596)
Supplement: mmc1 [file S0213911119302596:mmc1.docx]

**Apéndice**

**Tabla I**

Ajuste del modelo de regresión lineal múltiple incluyendo la interacción de la actividad económica y el sexo considerando la incapacidad permanente como variable dependiente

|  | **Coeficiente (DE)** |
| --- | --- |
| *Intercepción* | −0,9574 (0,879) |
| *Sexo (hombre)*  Mujer | −0,3289 (0,8094)d |
| *Cohorte (mayores)*  Media | 1,9934 (0,4788)d |
| Jóvenes | 0,7735 (0,6273) |
| *Actividad económica (agricultura, ganadería, pesca e industrias extractivas)*  Industria manufacturera  Producción y distribución de energía  Construcción  Comercio  Hostelería, transporte y telecomunicaciones  Intermediación financiera  Actividades inmobiliarias  Administración pública  Educación, actividades sanitarias, servicios a la comunidad y actividades en los hogares | 1,8898 (0,5528)d  1,8369 (0,7955)b  −0,5998 (0,8149)  0,9137 (0,5448)a  0,4289 (0,5237)  −1,6152 (0,7464)b  4,3459 (0,5262)d  −1,5996 (2,3234)  0,8082 (0,5345) |
| *Tramo de edad (25-34 años)*  26-35  27-36  28-37  29-38  30-39  31-40  32-41  33-42  34-43  35-44  36-45  37-46  38-47  39-48  40-49  41-50  42-51  43-52  44-53  45-54  46-55  47-56  48-57  49-58  50-59  51-60  52-61  53-62  54-63  55-64  56-65 | 0,1693 (0,5128)  0,2408 (0,5094)  0,3664 (0,5063)  0,4351 (0,5057)  0,4179 (0,5113)  0,6006 (0,5209)  0,5132 (0,5566)  0,6606 (0,5305)  0,5788 (0,5361)  0,9428 (0,5053)a  0,8532 (0,5057)a  1,6415 (0,6803)b  1,8468 (0,6779)c  1,4087 (0,6780)b  2,7425 (0,6823)d  3,8155 (0,6889)d  3,0846 (0,7345)d  3,6165 (0,6948)d  3,8017 (0,6991)d  4,1019 (0,6731)d  5,4457 (0,6746)d  6,1925 (0,8890)d  6,6993 (0,8874)d  7,7137 (0,8886)d  7,9728 (0,8936)d  9,2682 (0,9000)d  8,4339 (0,9614)d  9,1716 (0,9105)d  9,2058 (0,9210)d  9,3188 (0,9318)d  10,6015 (0,9441)d |
| *Interacción (actividad económica*Sexo)*  Industria manufacturera*Mujer  Producción y distribución de energía*Mujer  Construcción*Mujer  Comercio*Mujer  Hostelería, transporte y telecomunicaciones*Mujer  Intermediación financiera*Mujer  Actividades inmobiliarias*Mujer  Administración pública*Mujer  Educación, actividades sanitarias, servicios a la comunidad y actividades en los hogares*Mujer | −0,6059 (0,9540)  −0,2105 (1,5874)  −0,2790 (2,0608)  −0,6517 (1,0600)a  −0,1657 (0,8617)  1,5779 (1,1809)  −4,3540 (0,8619)d  3,8092 (3,1956)  −0,2040 (0,8600) |
| R2 ajustado = 0,734  N = 720 | |

a p <0,10.

b p <0,05.

c p <0,01.

d p <0,001.

Fuente: elaboración propia.

**Tabla II**

Ajuste del modelo de regresión lineal múltiple incluyendo la interacción de la actividad económica y el sexo considerando la mortalidad prematura como variable dependiente

|  | **Coeficiente (DE)** |
| --- | --- |
| *Intercepción* | 0,52056 (0,55027) |
| *Sexo (hombre)*  Mujer | −0,60420 (0,50730) |
| *Cohorte (mayores)*  Media | 0,16372 (0,30011) |
| Jóvenes | −0,22214 (0,39318) |
| *Actividad económica (agricultura, ganadería, pesca e industrias extractivas)*  Industria manufacturera  Producción y distribución de energía  Construcción  Comercio  Hostelería, transporte y telecomunicaciones  Intermediación financiera  Actividades inmobiliarias  Administración pública  Educación, actividades sanitarias, servicios a la comunidad y actividades en los hogares | 0,54093 (0,34650)  0,42543 (0,49860)  1,19137 (0,51078)b  0,35878 (0,34146)  0,26432 (0,32824)  −0,22155 (0,46779)  1,25788 (0,32980)d  1,66384 (1,45624)  −0,04533 (0,33501) |
| *Tramo de edad (25-34 años)*  26-35  27-36  28-37  29-38  30-39  31-40  32-41  33-42  34-43  35-44  36-45  37-46  38-47  39-48  40-49  41-50  42-51  43-52  44-53  45-54  46-55  47-56  48-57  49-58  50-59  51-60  52-61  53-62  54-63  55-64  56-65 | 0,02247 (0,32143)  0,06059 (0,31928)  0,03719 (0,31732)  −0,03533 (0,31698)  −0,12229 (0,32048)  0,08432 (0,32649)  −0,12541 (0,34887)  −0,01321 (0,33252)  0,04735 (0,33600)  −0,05703 (0,31672)  0,21490 (0,31694)  0,42602 (0,42636)  0,66060 (0,42489)  0,25339 (0,42493)  0,59341 (0,42766)  0,35003 (0,43176)  0,70244 (0,46038)  0,52846 (0,43551)  1,13259 (0,43819)c  0,97984 (0,42187)b  1,39623 (0,42280)c  1,34672 (0,55717)b  1,37103 (0,55618)b  1,41339 (0,55697)b  1,20936 (0,56006)b  2,05901 (0,56412)d  1,78153 (0,60255)c  2,07507 (0,57070)d  2,28448 (0,57724)d  2,31237 (0,58400)d  2,43652 (0,59173)d |
| *Interacción (actividad económica*Sexo)*  Industria manufacturera*Mujer  Producción y distribución de energía*Mujer  Construcción*Mujer  Comercio*Mujer  Hostelería, transporte y telecomunicaciones*Mujer  Intermediación financiera*Mujer  Actividades inmobiliarias*Mujer  Administración pública*Mujer  Educación, actividades sanitarias, servicios a la comunidad y actividades en los hogares*Mujer | −0,49660 (0,59796)  0,07081 (0,99491)  −0,97276 (1,29163)  −0,12078 (0,66438)  −0,19169 (0,54007)  0,34737 (0,74015)  −1,02382 (0,54021)a  −1,66275 (2,00293)  0,06962 (0,53905) |
| R2 ajustado = 0,3961  N = 720 | |

a p <0,10.

b p <0,05.

c p<0,01.

d p <0,001.

Fuente: elaboración propia.
